# Supplementary material
Source: PubMed Central journal article supplement (PMC7586726)
Supplement: NIHMS1620140-supplement-1.pdf [file NIHMS1620140-supplement-1.pdf]

**Supplementary Table 1: Criteria used to distinguish ‘histological healing’ from ‘histological activity’ according to modifications of the ileal global histological disease activity score (iGHAS).<sup>14</sup>**

| <b>Histological Healing</b>                                                                                                                                                                                                                  | <b>Histological Activity</b>                                                                                                                                                                                                                  |
|----------------------------------------------------------------------------------------------------------------------------------------------------------------------------------------------------------------------------------------------|-----------------------------------------------------------------------------------------------------------------------------------------------------------------------------------------------------------------------------------------------|
| None of the following:                                                                                                                                                                                                                       | Presence of any of the following:                                                                                                                                                                                                             |
| <ul style="list-style-type: none"> <li>• Lamina propria infiltration by neutrophils</li> <li>• Epithelial infiltration by neutrophils</li> <li>• Crypt abscesses</li> <li>• Erosions</li> <li>• Ulcerations</li> <li>• Granulomas</li> </ul> | <ul style="list-style-type: none"> <li>• Lamina propria infiltration by neutrophils</li> <li>• Epithelial infiltration by neutrophils,</li> <li>• Crypt abscesses</li> <li>• Erosions</li> <li>• Ulcerations</li> <li>• Granulomas</li> </ul> |
